# Supplementary material for: Olfactory threat extinction in the piriform cortex: An age-dependent employment of NMDA receptor-dependent long-term depression
Source: PubMed Central journal article supplement — Proc Natl Acad Sci U S A. 2023 Oct 25;120(44):e2309986120. doi: 10.1073/pnas.2309986120 (PMC10622944; doi:10.1073/pnas.2309986120), 2023-10-25
Supplement: pnas.2309986120.sapp.pdf [file pnas.2309986120.sapp.pdf]

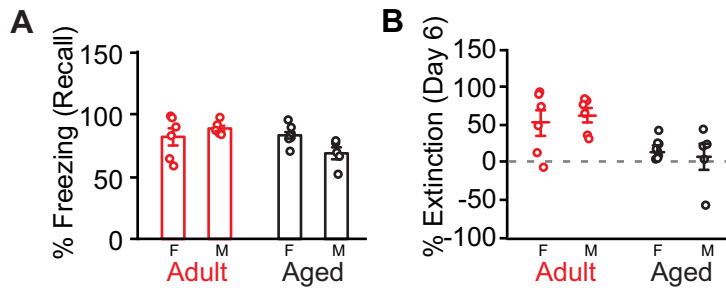

**Supplementary Figure 1. No sex differences in olfactory threat learning and extinction. A.** Percentage freezing at the time of recall. **B.** Percentage of extinction at the end of the training. F: female; M: male.

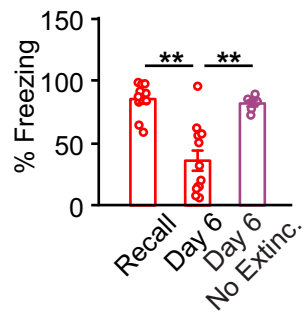

**Supplementary Figure 2. Reduced freezing in adult rats that undergo olfactory threat extinction training is not due to forgetting.** Comparisons of % Freezing in rats that underwent or did not undergo extinction training. Red indicates the extinction trained group, tested on recall day (24 hrs following the olfactory threat conditioning) and day 6 of the extinction training. Purple indicates the group that did not undergo extinction training, tested 6 days following the olfactory threat conditioning.

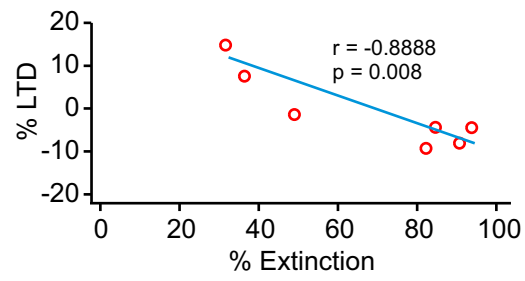

**Supplementary Figure 3. The degree of LTD is negatively correlated with the level of extinction in adult rats.**

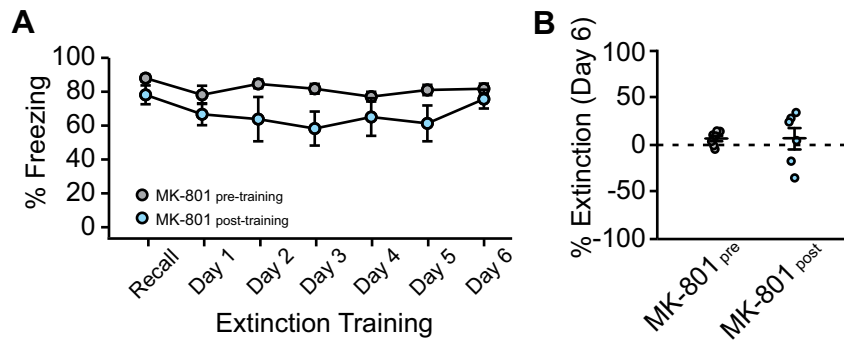

**Supplementary Figure 4. MK-801 blockade of olfactory threat extinction in adult rats is not drug-state-dependent.** **A.** Percentage of freezing to the conditioned odor in rats with MK-801 injections 30 min pre- or immediately post-extinction training. **B.** Percentage extinction on day 6 in the two groups.

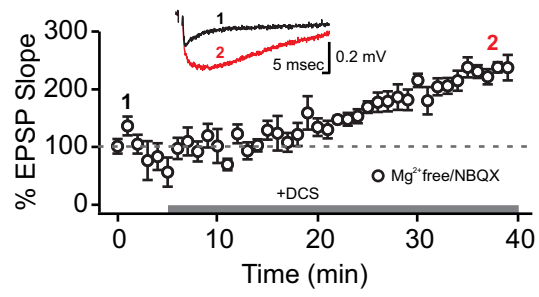

**Supplementary Figure 5. D-cycloserine (DCS) enhances NMDAR EPSP**

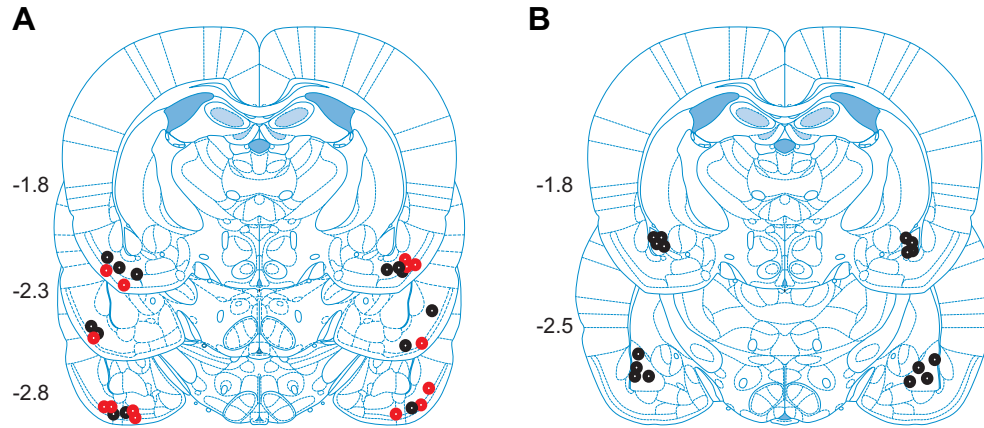

**Supplementary Figure 6. Cannula placements for piriform cortex (A) and amygdala (B).**

Coronal sections of rats' brains showing the cannula tip locations (red circles: adult; black circles: aged), with distance from Bregma indicated. Atlas plates were taken from Paxinos and Watson (6<sup>th</sup> edition) (Paxinos and Watson, 2009)

Paxinos G, Watson C (2009) The rat brain in stereotaxic coordinates, Sixth Edition. San Diego, CA: Academic Press.
